# Supplementary material
Source: PubMed Central journal article supplement (PMC4642276)

Fig.S1

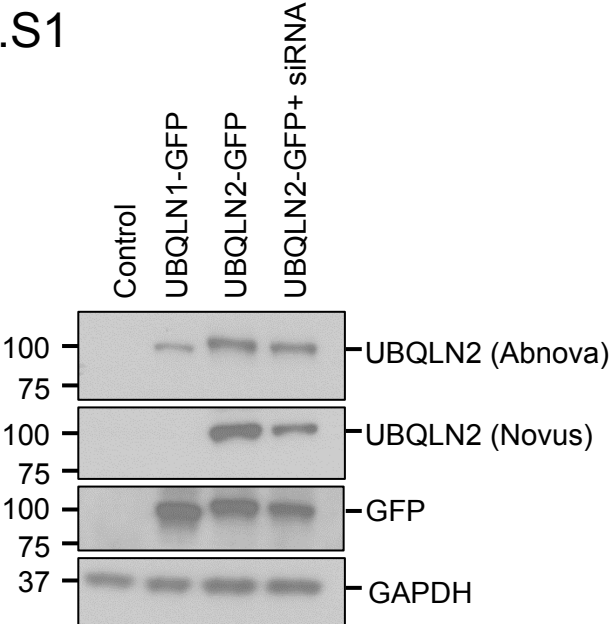

Supplement: NIHMS709957-supplement-1.pdf [file NIHMS709957-supplement-1.pdf]

Fig.S2

A

Striatum

Wild-type

HD-KI (Q200)

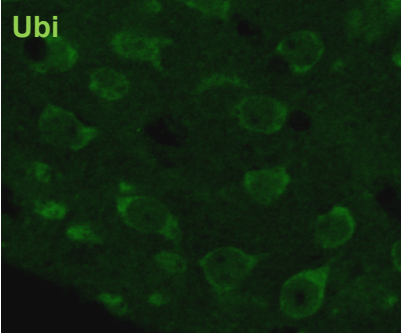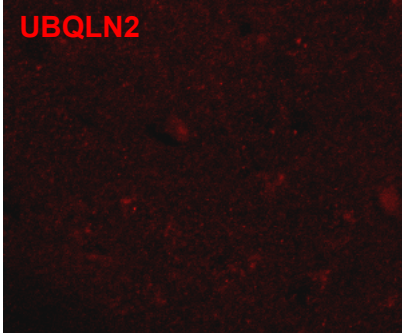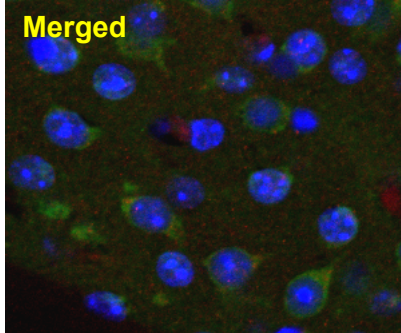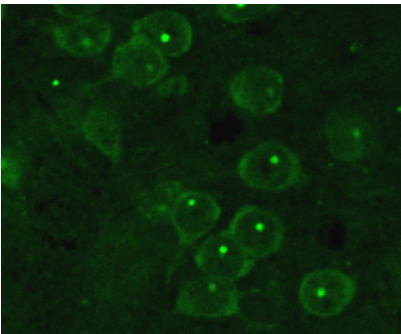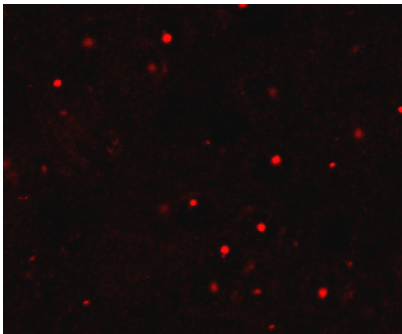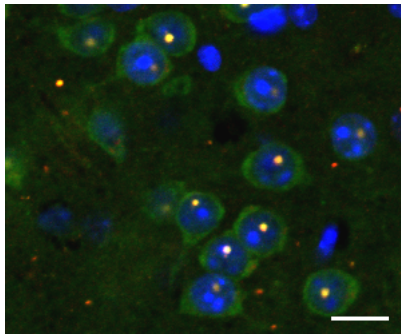

Supplement: NIHMS709957-supplement-2.pdf [file NIHMS709957-supplement-2.pdf]
